# Supplementary material for: AMIGO2, a toolbox for dynamic modeling, optimization and control in systems biology
Source: PubMed Central journal article supplement — Bioinformatics. 2016 Jul 4;32(21):3357–9. doi: 10.1093/bioinformatics/btw411 (PMC5079478; doi:10.1093/bioinformatics/btw411), 2016-07-04
Supplement: supp_btw411_SuppInfo_SBTools_Features.pdf [file supp_btw411_SuppInfo_SBTools_Features.pdf]

SUPPLEMENTARY INFO: AMIGO2, a toolbox for dynamic modeling, optimization and control in systems biology

Table S1: Summary of features of systems biology dynamic modelling related toolboxes

|                                    | AMIGO2                                                                                                                                                                                                                                          | COPASI                                                                                              | Data2Dynamics                                                                                                                  | SBtoolbox2/IQM                                                                                                                 |
|------------------------------------|-------------------------------------------------------------------------------------------------------------------------------------------------------------------------------------------------------------------------------------------------|-----------------------------------------------------------------------------------------------------|--------------------------------------------------------------------------------------------------------------------------------|--------------------------------------------------------------------------------------------------------------------------------|
| <b>Programming Environment</b>     | MATLAB plus MEX                                                                                                                                                                                                                                 | Stand-alone                                                                                         | MATLAB plus MEX                                                                                                                | MATLAB plus MEX                                                                                                                |
| <b>Types of models</b>             | <b>ODEs</b>                                                                                                                                                                                                                                     | General non-linear ODEs                                                                             | Biochemical reaction equation based models                                                                                     | Biochemical reaction equation based models                                                                                     |
|                                    | <b>PDEs / DDEs</b>                                                                                                                                                                                                                              | Link to external simulators (blackbox)                                                              | N.A.                                                                                                                           | N.A.                                                                                                                           |
| <b>Model simulation</b>            | Runge-Kutta; Adams; BDF methods; CVODES                                                                                                                                                                                                         | LSODAR; Gillespi and hybrids for stochastic simulation                                              | CVODES                                                                                                                         | CVODES                                                                                                                         |
| <b>Sensitivity analysis</b>        | Local / Global sensitivities (parameters and initial/boundary conditions); Finite differences with several formulae; CVODES                                                                                                                     | Local sensitivities; Metabolic control analysis; Finite differences                                 | Local sensitivities; CVODES                                                                                                    | Local and global sensitivities; Metabolic control analysis; CVODES                                                             |
| <b>Identifiability analysis</b>    | Asymptotic (Fisher Information Matrix, Local sensitivities); cost plots; robust Monte-Carlo                                                                                                                                                     | Asymptotic (Fisher Information Matrix, local sensitivities)                                         | Asymptotic (Fisher Information Matrix, local sensitivities); Profile likelihood                                                | Asymptotic (Fisher Information Matrix, local sensitivities); Monte-Carlo                                                       |
| <b>Parameter estimation</b>        | Multi-experiment; local and global parameters and initial conditions; several cost functions; several noise models; multiple local and global optimizers; sequential hybrid optimizers; general constraints; PE Cost in C or Full C code for PE | Multi-experiment; several cost functions; several noise models; several local and global optimizers | Multi-experiment; local and global unknowns; several cost functions; several noise models; several local and global optimizers | Multi-experiment; local and global unknowns; several cost functions; several noise models; several local and global optimizers |
| <b>Best fit Post-Analysis</b>      | Several best-fit analyses; analysis of residuals                                                                                                                                                                                                | Several best-fit analyses; analysis of residuals                                                    | Several best-fit analyses; analysis of residuals                                                                               | Several best-fit analyses; analysis of residuals                                                                               |
| <b>Regularization techniques</b>   | Tikhonov regularization with fixe regularization parameter or L-Shape Pareto curve; exact Jacobians                                                                                                                                             | N.A.                                                                                                | N.A.                                                                                                                           | N.A.                                                                                                                           |
| <b>Optimal experimental design</b> | Multi-experiment; several cost functions; several noise models; Designs observables; Number and location of sampling times; Stimulation and initial conditions; Experiment(s) duration(s); experimental constraints                             | N.A.                                                                                                | N.A.                                                                                                                           | N.A.                                                                                                                           |

|                                                                                   |                                                                                                                      |                                                                                                                            |                                                              |                                                                                                                                 |
|-----------------------------------------------------------------------------------|----------------------------------------------------------------------------------------------------------------------|----------------------------------------------------------------------------------------------------------------------------|--------------------------------------------------------------|---------------------------------------------------------------------------------------------------------------------------------|
| <b>(Multi-objective) Optimal control / design / Dynamic flux balance analysis</b> | Non-linear constrained optimization; flexible cost functions; path and point constraints; single- or multi-objective | N.A.                                                                                                                       | N.A.                                                         | N.A.                                                                                                                            |
| <b>Other features</b>                                                             | Test your own optimizer; Network visualization with Cytoscape                                                        | Stoichiometric analysis of the reaction network; Time scale separation analysis; Lyapunov exponents; Network visualization | Some distributed computing facilities; Network visualization | Stoichiometric analysis of the reaction network; Steady-state and stability analysis; Pharmacology tools; Network visualization |

**N.A.: Not available**

**Table S2: Comparison between AMIGO and AMIGO2 - Summary of novelties in AMIGO2**

|                                                                                   |                                                                   |
|-----------------------------------------------------------------------------------|-------------------------------------------------------------------|
| <b>Model simulation</b>                                                           | CVODES                                                            |
| <b>Sensitivity analysis</b>                                                       | New finite differences schemes; CVODES                            |
| <b>Parameter estimation</b>                                                       | New experimental noise models                                     |
|                                                                                   | New PE cost functions (more weighted least squares possibilities) |
|                                                                                   | New enhanced optimizers - exact Jacobian                          |
|                                                                                   | New asymptotic confidence analysis in parameters and observables  |
|                                                                                   | Nonlinear constraints                                             |
|                                                                                   | C enhancements: PE Cost in C or Full C code for PE                |
| <b>Identifiability analysis</b>                                                   | Updated for new noise models                                      |
| <b>Best fit Post-Analysis</b>                                                     | N.A. in AMIGO                                                     |
| <b>Regularization techniques</b>                                                  | N.A. in AMIGO                                                     |
| <b>Optimal experimental design</b>                                                | Desing of observables                                             |
|                                                                                   | Simultaneous desing of number and location of sampling times      |
|                                                                                   | Updated stimulation design                                        |
|                                                                                   | Nonlinear constraints                                             |
| <b>(Multi-objective) Optimal control / design / Dynamic flux balance analysis</b> | N.A. in AMIGO                                                     |
| <b>Other features (above)</b>                                                     | N.A. in AMIGO                                                     |
| <b>Other improvements</b>                                                         | Bugs corrected                                                    |
